# Supplementary material for: 4/6-Herto-arm and 4/6-mikto-arm star-shaped block polymeric drug-loaded micelles and their pH-responsive controlled release properties: a dissipative particle dynamics simulation
Source: Royal Society of Chemistry journal article supplement (doi:10.1039/c9cp02411e), 2019-01-01
Supplement: c9cp02411e1.pdf [file c9cp02411e1.pdf]

## Supporting Information

### 4/6-herto-arm and 4/6-mikto-arm star-shaped block polymeric drug-loaded micelles and their pH-responsive controlled release properties:

#### A dissipative particle dynamics simulation

Wensheng Wu,<sup>1</sup> Peng Yi,<sup>2,3</sup> Jing Zhang,<sup>4</sup> Yingchao Cheng,<sup>1</sup> Zhiwei Li,<sup>1</sup> Xiangying Hao,<sup>1</sup> Quan Chen<sup>\*,2,3</sup>

1. *School of Environmental and Chemical Engineering, Zhaoqing University, Zhaoqing, 526061, Guangdong, China;*
2. *Faculty of Environmental Science & Engineering, Kunming University of Science & Technology, Kunming, 650500, Yunnan, China;*
3. *Yunnan Provincial Key Lab of Soil Carbon Sequestration and Pollution Control in Soils, Kunming, 650500, Yunnan, China;*
4. *School of Chemistry and Chemical Engineering, South China University of Technology, Guangzhou, 510640, China.*

#### 1.1 Specific block ratios of the polymers

The five polymers of 4-mikto-arm are:  $(\text{PCL}_{24})_2(\text{PDEA}_{10}\text{-}b\text{-PPEGMA}_{19})_2$ ,  $(\text{PCL}_{24})_2(\text{PDEA}_{16}\text{-}b\text{-PPEGMA}_{19})_2$ ,  $(\text{PCL}_{24})_2(\text{PDEA}_{22}\text{-}b\text{-PPEGMA}_{19})_2$ ,  $(\text{PCL}_{24})_2(\text{PDEA}_{28}\text{-}b\text{-PPEGMA}_{19})_2$ , and  $(\text{PCL}_{24})_2(\text{PDEA}_{34}\text{-}b\text{-PPEGMA}_{19})_2$ ; The five polymers of 6-mikto-arm are:  $(\text{PCL}_{16})_3(\text{PDEA}_8\text{-}b\text{-PPEGMA}_{10})_3$ ,  $(\text{PCL}_{16})_3(\text{PDEA}_{14}\text{-}b\text{-PPEGMA}_{10})_3$ ,  $(\text{PCL}_{16})_3(\text{PDEA}_{20}\text{-}b\text{-PPEGMA}_{10})_3$ ,  $(\text{PCL}_{16})_3(\text{PDEA}_{26}\text{-}b\text{-PPEGMA}_{10})_3$  and  $(\text{PCL}_{16})_3(\text{PDEA}_{32}\text{-}b\text{-PPEGMA}_{10})_3$ ; The five polymers of 4-uniform-arm are:  $(\text{PCL}_{22}\text{-PDEA}_{25}\text{-}b\text{-PPEGMA}_5)_4$ ,  $(\text{PCL}_{22}\text{-PDEA}_{31}\text{-}b\text{-PPEGMA}_5)_4$ ,  $(\text{PCL}_{22}\text{-PDEA}_{37}\text{-}b\text{-PPEGMA}_5)_4$ ,  $(\text{PCL}_{22}\text{-PDEA}_{43}\text{-}b\text{-PPEGMA}_5)_4$ ,  $(\text{PCL}_{22}\text{-PDEA}_{49}\text{-}b\text{-PPEGMA}_5)_4$ ; The five polymers of 6-uniform-arm are:  $(\text{PCL}_{18}\text{-PDEA}_9\text{-}b\text{-PPEGMA}_4)_6$ ,  $(\text{PCL}_{18}\text{-PDEA}_{15}\text{-}b\text{-PPEGMA}_4)_6$ ,  $(\text{PCL}_{18}\text{-PDEA}_{21}\text{-}b\text{-PPEGMA}_4)_6$ ,  $(\text{PCL}_{18}\text{-PDEA}_{27}\text{-}b\text{-PPEGMA}_4)_6$ ,  $(\text{PCL}_{18}\text{-PDEA}_{33}\text{-}b\text{-PPEGMA}_4)_6$ . For convenience of representation, the 20 polymers

after the increase and decrease of DEA block length are expressed as: 4M-6DEA, 4M, 4M+6DEA, 4M+12DEA, 4M+18DEA, 6M-6DEA, 6M, 6M+6DEA, 6M+12DEA, 6M+18DEA, 4H, 4H+6DEA, 4H+12DEA, 4H+18DEA, 4H+24DEA, 6H, 6H+6DEA, 6H+12DEA, 6H+18DEA, 6H+24DEA.

## 1.2 Calculation method of the interaction parameters between the beads under weakly acidic conditions

The pH-sensitive mainly depends on the protonation of the protonated group in the environment. The drug release behavior of the drug-loaded micelles in the acidic condition of cancer cells using the same pH environment simulation as the actual experiment (pH=5.0). The degree of protonation of the pH response depends on the  $pK_a$  value of the pH-sensitive group itself and the pH environment in which it is located. The degree of protonation of the group is calculated by the Henderson-Hasselbalch formula to obtain a pH-sensitive group in an environment of pH 5.0. The degree of protonation of the group is 100%. The interaction parameters between the beads calculated from the degree of protonation are shown in **Table S1**. The simulation time for the drug release process of the simulated drug-loaded micelles was set to 100000 steps, the time integration step was 0.05 ns, the elastic constant  $C$  was set to 4.0, and the dissipation force parameter  $\gamma$  was set to 4.5.

**Table S1** Interaction parameters between the beads under weakly acid conditions (pH=5.0)

|        | CL    | Center | D1     | D2     | D3    | DEAH  | MAA1  | MAA2  | PEG | Water |
|--------|-------|--------|--------|--------|-------|-------|-------|-------|-----|-------|
| CL     | 25.00 |        |        |        |       |       |       |       |     |       |
| Center | 33.32 | 25.00  |        |        |       |       |       |       |     |       |
| D1     | 27.46 | 50.19  | 25.00  |        |       |       |       |       |     |       |
| D2     | 26.24 | 31.58  | 26.54  | 25.00  |       |       |       |       |     |       |
| D3     | 33.42 | 67.16  | 29.48  | 28.54  | 25.00 |       |       |       |     |       |
| DEAH   | 92.20 | 27.39  | 111.11 | 112.04 | 79.37 | 25.00 |       |       |     |       |
| MAA1   | 25.01 | 38.96  | 26.91  | 25.84  | 31.50 | 34.60 | 25.00 |       |     |       |
| MAA2   | 25.01 | 38.96  | 26.91  | 25.84  | 31.50 | 34.60 | 25.00 | 25.00 |     |       |

|       |        |        |       |       |       |       |       |       |       |       |
|-------|--------|--------|-------|-------|-------|-------|-------|-------|-------|-------|
| PEG   | 39.01  | 50.49  | 26.05 | 25.00 | 27.50 | 22.18 | 25.54 | 25.54 | 25.00 |       |
| Water | 114.16 | 111.62 | 57.97 | 27.03 | 21.97 | 11.43 | 61.50 | 61.50 | 28.10 | 25.00 |

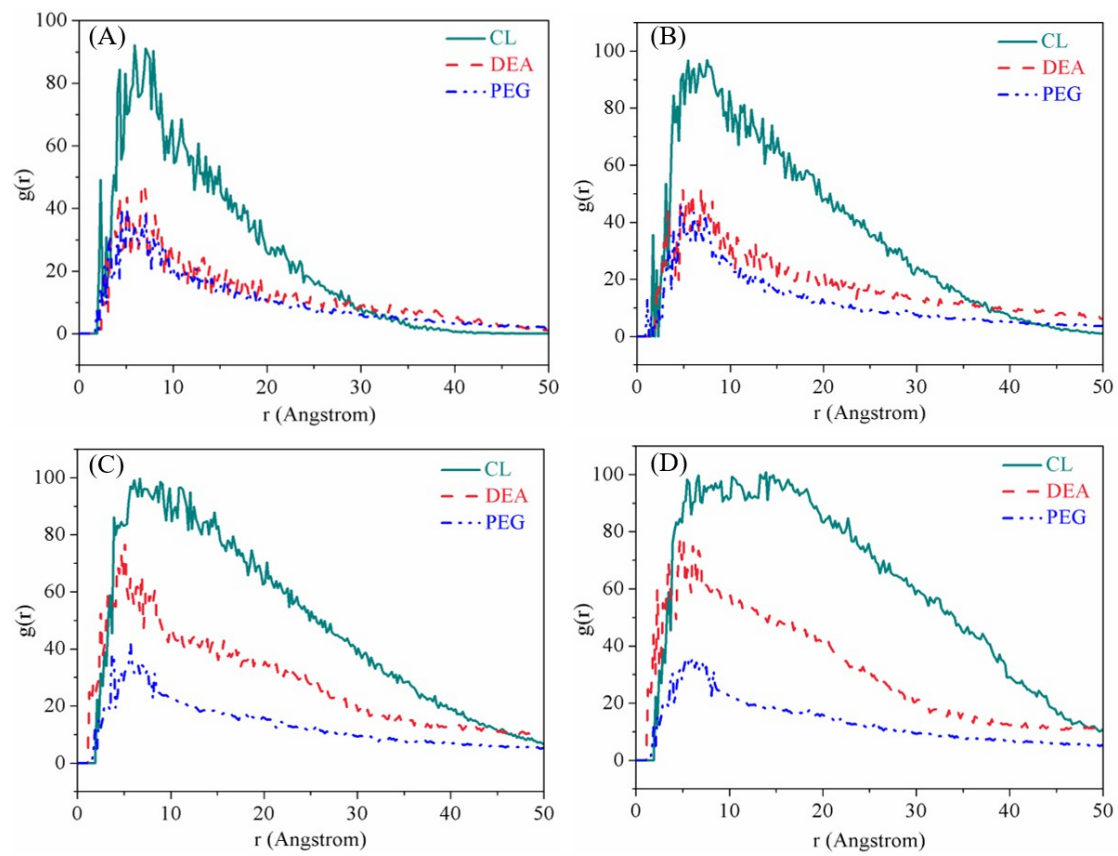

**Figure S1** Radial distribution function curves of the boxes with different volume (A:150 Å<sup>3</sup>; B:200 Å<sup>3</sup>; C:250 Å<sup>3</sup>; D:300 Å<sup>3</sup>)

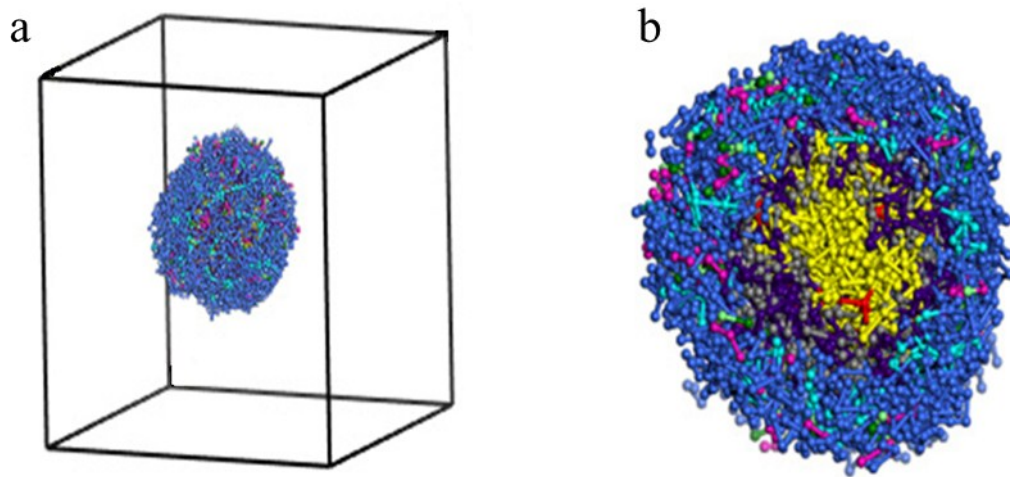

**Figure S2** Micellar structure of the polymer 6M and its cross-sectional view

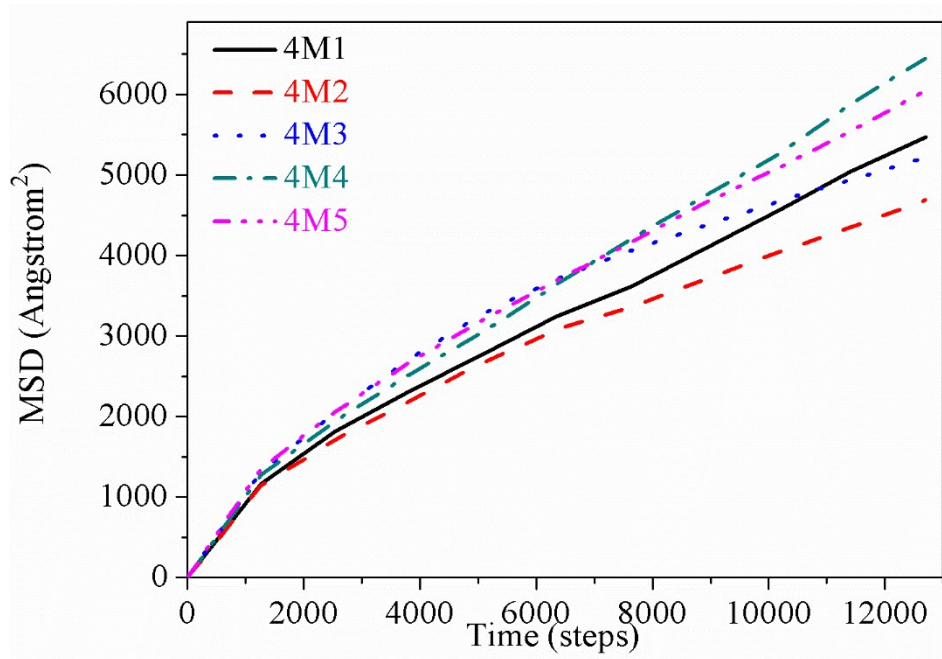

**Figure S3** Mean square displacement curves of the DEAH block in 4-mikto-arm polymeric drug-loaded micelle system
